# Supplementary material
Source: HighWire-hosted journal article supplement (https://bmjopen.bmj.com/content/14/9/e089108)
Supplement: inline-supplementary-material-1 [file inline-supplementary-material-1.pdf]

# Newborn WGS Survey

Please read the following information and complete the survey below.

Consent Form

This survey is part of the study exploring UK medical student's opinions on employing whole genome sequencing in newborn screening and is intended for clinical medical students in their final two years of study.

The survey should take 10-20 minutes to complete.

The aim of the survey is to help us understand your views on offering whole genome sequencing to all newborns within the NHS, the potential risks and benefits and your educational experience and training needs in genomics. You do not need to have any experience in genomics to take part.

To maintain anonymity of participants, the survey findings will be grouped for analysis and reporting.

Please read the participant information sheet below, which includes detailed information on how we protect your data. If you have any queries, please get in touch with Dr Cristine Sortica da Costa at [Cristine.sorticadacosta@gosh.nhs.uk](mailto:Cristine.sorticadacosta@gosh.nhs.uk)

If you are happy to take part in the survey, please tick each box below to give your consent to take part in the survey.

[Attachment: "Participant information sheet.pdf"]

|                                                                                                                                                                                                                        |                              |
|------------------------------------------------------------------------------------------------------------------------------------------------------------------------------------------------------------------------|------------------------------|
| I confirm that I have read and understood the participant information sheet for this survey.                                                                                                                           | <input type="checkbox"/> Yes |
| I understand that completing the survey is my choice and that I am free to stop at any time without submitting a completed survey.                                                                                     | <input type="checkbox"/> Yes |
| I understand that the survey is anonymous and that it will not be possible to withdraw my survey answers after the survey has been submitted.                                                                          | <input type="checkbox"/> Yes |
| I understand that certain phrases or sentences that I write in the survey may be quoted in future reports or publications but that my name will not be included and any possible identifying comments will be removed. | <input type="checkbox"/> Yes |
| I consent to taking part in this survey.                                                                                                                                                                               | <input type="checkbox"/> Yes |

**Demographics**

Which university/medical school do you currently attend?

- ☐ University of Aberdeen
- ☐ Anglia Ruskin University
- ☐ Aston University
- ☐ Barts and the London School of Medicine
- ☐ Brighton and Sussex Medical School
- ☐ University of Bristol
- ☐ University of Cambridge
- ☐ Cardiff University
- ☐ University of Dundee
- ☐ University of Edinburgh
- ☐ University of Exeter
- ☐ University of Glasgow
- ☐ Hull York Medical School
- ☐ Imperial College London
- ☐ Keele University
- ☐ King's College London
- ☐ Lancaster University
- ☐ University of Leeds
- ☐ University of Leicester
- ☐ University of Liverpool
- ☐ University of Manchester
- ☐ University of Newcastle
- ☐ University of East Anglia
- ☐ University of Oxford
- ☐ University of Plymouth
- ☐ Queen's University Belfast
- ☐ University of Sheffield
- ☐ University of Southampton
- ☐ St George's, University of London
- ☐ Swansea University
- ☐ University College London
- ☐ University of Warwick

Which of the following best describes the main form of teaching at your medical school?

- ☐ Integrated
- ☐ Problem-Based Learning
- ☐ Traditional

In what year do you expect to graduate?

- ☐ 2023
- ☐ 2024

How old are you?

- ☐ 21
- ☐ 22
- ☐ 23
- ☐ 24
- ☐ 25
- ☐ Over 25

What is your gender?

- ☐ Male
- ☐ Female
- ☐ Non-binary
- ☐ Prefer not to say

Genomics Educational Experience

Approximately how much teaching have you received during your medical degree on the basic sciences of genomics?

NoneSomeLots

(Place a mark on the scale above)

Approximately how much teaching have you received during your medical degree on genomic medicine (the clinical application of genomics)?

NoneSomeLots

(Place a mark on the scale above)

Have you had any additional genomics experience beyond your core medical school curriculum?  
(Tick all that apply)

- ☐ Intercalation or other undergraduate degree
- ☐ Student selected component of your medical degree
- ☐ Research project outside of a degree (e.g. summer projects)
- ☐ Graduate degree (e.g. MSc, MPhil, PhD)
- ☐ Other
- ☐ None

Genomics Knowledge

How confident do you feel in your understanding of the following:

|                                                                                                                                                         | Not at all confident  | Somewhat confident    | Neutral               | Confident             | Very confident        |
|---------------------------------------------------------------------------------------------------------------------------------------------------------|-----------------------|-----------------------|-----------------------|-----------------------|-----------------------|
| The difference between DNA, genes and chromosomes                                                                                                       | <input type="radio"/> |
| Identifying inheritance patterns from family pedigrees e.g. autosomal dominant, X-linked, mitochondrial                                                 | <input type="radio"/> |
| The difference between copy number and sequence variants                                                                                                | <input type="radio"/> |
| The difference between loss-of-function and gain-of-function variants                                                                                   | <input type="radio"/> |
| The difference between synonymous and missense variants                                                                                                 | <input type="radio"/> |
| The difference between somatic and germline variants                                                                                                    | <input type="radio"/> |
| The concept of mosaicism                                                                                                                                | <input type="radio"/> |
| The difference between clinically used genomic tests, such as microarray, single gene test, gene panel, whole exome sequencing, whole genome sequencing | <input type="radio"/> |
| The concept of genetic contributions to common complex diseases such as type 2 diabetes                                                                 | <input type="radio"/> |
| How you might approach interpretation of variants eg identifying whether a variant is more likely to be pathogenic or benign                            | <input type="radio"/> |

Newborn Screening Programme

Were you aware of the proposed pilot for expanding newborn screening to include whole genome sequencing before this survey?

☐ Yes

☐ No

Based on your current understanding, how much do you agree with the following statements about newborn whole genome sequencing (WGS):

If you feel unable to either agree or disagree due to a lack of knowledge on the subject, please select "Not enough knowledge".

|                                                                                                                        | Completely disagree   | Somewhat disagree     | Somewhat agree        | Completely agree      | Not enough knowledge  |
|------------------------------------------------------------------------------------------------------------------------|-----------------------|-----------------------|-----------------------|-----------------------|-----------------------|
| The current newborn screening programme identifies all early-onset conditions that we need to know about in childhood. | <input type="radio"/> |
| Newborn WGS could identify important childhood-onset conditions that the current programme does not                    | <input type="radio"/> |
| Newborn WGS could cause an increase in unnecessary anxiety amongst parents                                             | <input type="radio"/> |
| Newborn WGS could be reassuring for parents                                                                            | <input type="radio"/> |
| Newborn WGS could speed up diagnosis of childhood illnesses                                                            | <input type="radio"/> |
| Newborn WGS could improve long term outcomes of individual paediatric patients                                         | <input type="radio"/> |
| Newborn WGS could lead to over-medicalisation of children                                                              | <input type="radio"/> |
| Newborn WGS could provide useful data for paediatric research e.g. clinical trials                                     | <input type="radio"/> |
| Newborn WGS will cost too much to the NHS; the money is better off being spent elsewhere                               | <input type="radio"/> |
| Newborn WGS would cause more harm than good                                                                            | <input type="radio"/> |

Do you agree or disagree that the following categories of disease should be included in newborn WGS screening:

|                                                                                                | Completely disagree              | Somewhat disagree     | Neutral               | Somewhat agree        | Completely agree      |
|------------------------------------------------------------------------------------------------|----------------------------------|-----------------------|-----------------------|-----------------------|-----------------------|
| Diseases where symptoms or treatment would start during infancy (0-1 years)                    | <input checked="" type="radio"/> | <input type="radio"/> | <input type="radio"/> | <input type="radio"/> | <input type="radio"/> |
| Diseases where symptoms or treatment would start during childhood (2-12 years)                 | <input type="radio"/>            | <input type="radio"/> | <input type="radio"/> | <input type="radio"/> | <input type="radio"/> |
| Diseases where symptoms or treatment would start during adolescence (12-17 years)              | <input type="radio"/>            | <input type="radio"/> | <input type="radio"/> | <input type="radio"/> | <input type="radio"/> |
| Diseases where symptoms or treatment would start during adulthood (18 years+)                  | <input type="radio"/>            | <input type="radio"/> | <input type="radio"/> | <input type="radio"/> | <input type="radio"/> |
| Diseases for which there are effective treatments available                                    | <input type="radio"/>            | <input type="radio"/> | <input type="radio"/> | <input type="radio"/> | <input type="radio"/> |
| Diseases for which there are currently no effective treatments available, only supportive care | <input type="radio"/>            | <input type="radio"/> | <input type="radio"/> | <input type="radio"/> | <input type="radio"/> |

Who do you think should have access to the raw data generated by newborn WGS?  
  
(Tick all that apply)

☐ Clinicians directly involved in the patient's care

☐ Clinicians not directly involved in the patient's care

☐ Parents

☐ Research groups in the NHS or affiliated universities

☐ Research groups in the pharmaceutical industry

☐ Public health bodies

☐ Other

If you have selected "Other", please specify your answer.

Benefits of newborn WGS

What do you think are some of the main potential benefits of introducing routine WGS in newborn screening?

Please rate the importance of the following potential benefits of newborn WGS:

|                                                                                         | (Not important)<br>1  | 2                     | (Neutral) 3           | 4                     | (Very important)<br>5 |
|-----------------------------------------------------------------------------------------|-----------------------|-----------------------|-----------------------|-----------------------|-----------------------|
| Earlier diagnosis                                                                       | <input type="radio"/> |
| Enabling a diagnosis to be reached in more patients                                     | <input type="radio"/> |
| Earlier interventions and personalised care                                             | <input type="radio"/> |
| Enabling research into new treatments                                                   | <input type="radio"/> |
| Lifetime genomic record for the patient                                                 | <input type="radio"/> |
| Increased awareness of genetic conditions among the public and healthcare professionals | <input type="radio"/> |
| Long-term cost-effectiveness to the NHS                                                 | <input type="radio"/> |

Which potential benefit do you believe would be the most significant?

☐ Earlier diagnosis  
☐ Enabling a diagnosis to be reached in more patients  
☐ Earlier interventions and personalised care  
☐ Enabling research into new treatments  
☐ Lifetime genomic record for the patient  
☐ Increased awareness of genetic conditions among the public and healthcare professionals  
☐ Long-term cost-effectiveness to the NHS

Please describe any other potential benefits of newborn WGS.

Drawbacks of newborn WGS

What do you think are some of the main potential drawbacks of introducing routine WGS in newborn screening?

Please rate the importance of the following potential drawbacks of newborn WGS:

|                                                                                                                                 | (Not important)<br>1  | 2                     | (Neutral) 3           | 4                     | (Very important)<br>5 |
|---------------------------------------------------------------------------------------------------------------------------------|-----------------------|-----------------------|-----------------------|-----------------------|-----------------------|
| Screening for a wider range of conditions with WGS so soon after birth could interfere with the early bonding process           | <input type="radio"/> |
| Emotional impact on parents/carers in receiving an early genetic diagnosis who otherwise appears healthy                        | <input type="radio"/> |
| Upskilling the workforce                                                                                                        | <input type="radio"/> |
| Parents consenting to obtaining information that has the potential to impact the newborn at any point throughout their lifetime | <input type="radio"/> |
| Risk that parents are falsely reassured by a normal report                                                                      | <input type="radio"/> |
| Risk of incidental or uncertain findings                                                                                        | <input type="radio"/> |
| Identifying conditions for which effective treatments aren't available                                                          | <input type="radio"/> |
| Lack of resource in the NHS to support families (e.g. counselling)                                                              | <input type="radio"/> |
| Potential for future discrimination on the basis of genomic information (e.g. insurance implications)                           | <input type="radio"/> |
| Privacy and security of data                                                                                                    | <input type="radio"/> |
| Cost effectiveness                                                                                                              | <input type="radio"/> |

Which potential drawback do you believe would be the most significant?

☐ Screening for a wider range of conditions with WGS so soon after birth could interfere with the early bonding process

☐ Emotional impact on parents/carers in receiving an early genetic diagnosis who otherwise appears healthy

☐ Upskilling the workforce

☐ Parents consenting to obtaining information that has the potential to impact the newborn at any point throughout their lifetime

☐ Risk that parents are falsely reassured by a normal report

☐ Risk of incidental or uncertain findings

☐ Identifying conditions for which effective treatments aren't available

☐ Lack of resource in the NHS to support families (e.g. counselling)

☐ Potential for future discrimination on the basis of genomic information (e.g. insurance implications)

☐ Privacy and security of data

☐ Cost-effectiveness

Please describe any other potential drawbacks of newborn WGS.

Overall, do you support the introduction of WGS to the newborn screening programme?

Definitely not

Neutral

Definitely yes

(Place a mark on the scale above)

How relevant do you see the newborn WGS programme to your future medical practice?

Not at all relevant

Neutral

Extremely relevant

(Place a mark on the scale above)

Please explain your answer to the previous two questions.

If you have any final comments or thoughts regarding the introduction of WGS to the newborn screening programme, please write them here.
